# Supplementary material for: Molecular structure, spectral analysis and hydrogen bonding analysis of ampicillin trihydrate: a combined DFT and AIM approach
Source: Royal Society of Chemistry journal article supplement (doi:10.1039/c5nj01779c), 2015-01-01
Supplement: c5nj01779c1.pdf [file c5nj01779c1.pdf]

## Molecular structure, spectral analysis and hydrogen bonding analysis of ampicillin trihydrate: A combined DFT and AIM approach

Eram Khan, Anuradha Shukla, Anubha Srivastava, Shweta, Poonam Tandon\*

New Journal of Chemistry

Date

### †Electronic supplementary information

3D MEP of the monomer of AT calculated from optimized structure is shown in Fig. S1. Fig. S2 shows the HOMO and LUMO of monomer and its energy gap. The molecular graph of monomer of AT using AIM program is given in Fig. S3. The experimental and calculated geometric parameters of monomer and dimer of AT is given in Table S1. Selected Lewis orbitals with percentage ED over bonded atoms, hybrid NBOs with s and p character in % for monomer of AT are listed in Table S2. The calculated static dipole moment ( $\mu_0$ ), the mean polarizability ( $\langle\alpha_0\rangle$ ), the anisotropy of the polarizability ( $\Delta\alpha$ ), the mean first order hyperpolarizability ( $\beta_0$ ) and their components for monomer and dimer of AT, using B3LYP/6-311++G(d,p) are given in Table S3. The thermodynamic properties at different temperatures for monomer of AT is given in Table S4. Table S5 gives the information about the theoretically calculated total energy (eV), zero-point energy (J/mol), enthalpy (kcal/mol), specific heat ( $\text{cal}\cdot\text{mol}^{-1}\text{K}^{-1}$ ), entropy ( $\text{cal}\cdot\text{mol}^{-1}\text{K}^{-1}$ ) and rotational constants (GHz) at 298.15 K for monomer and dimer of AT. The geometrical parameters for hydrogen bonds in dimer of AT are given in Table S6. Table S7 gives the theoretical and experimental vibrational wavenumbers ( $\text{cm}^{-1}$ ) of AT with potential energy distribution (PED).

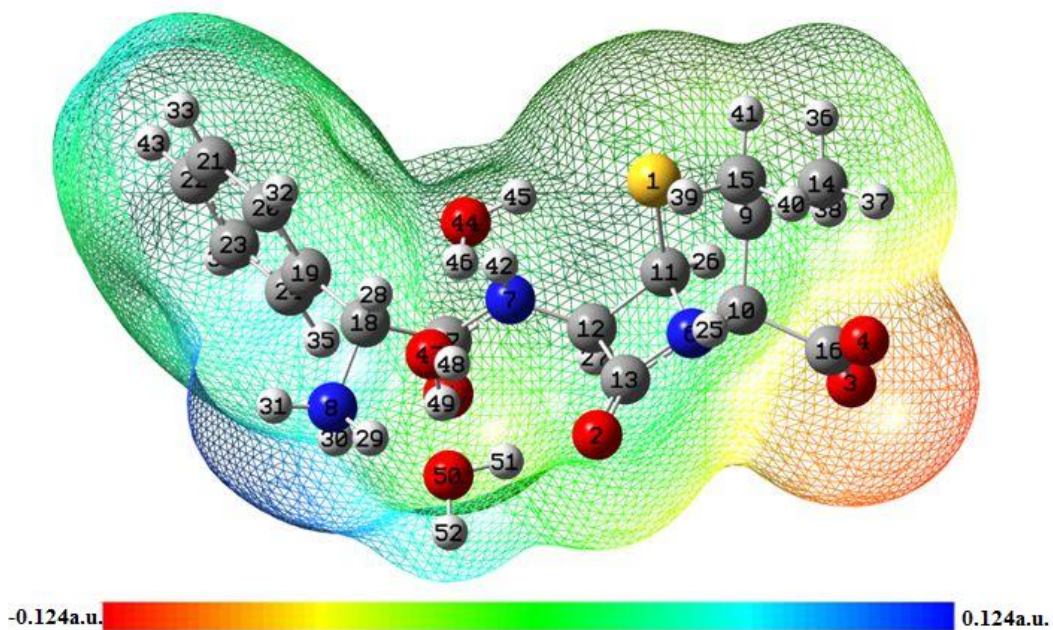

**Fig. S1.** Molecular electrostatic potential (MEP) formed by mapping of total density over electrostatic potential in gas phase for monomer of AT.

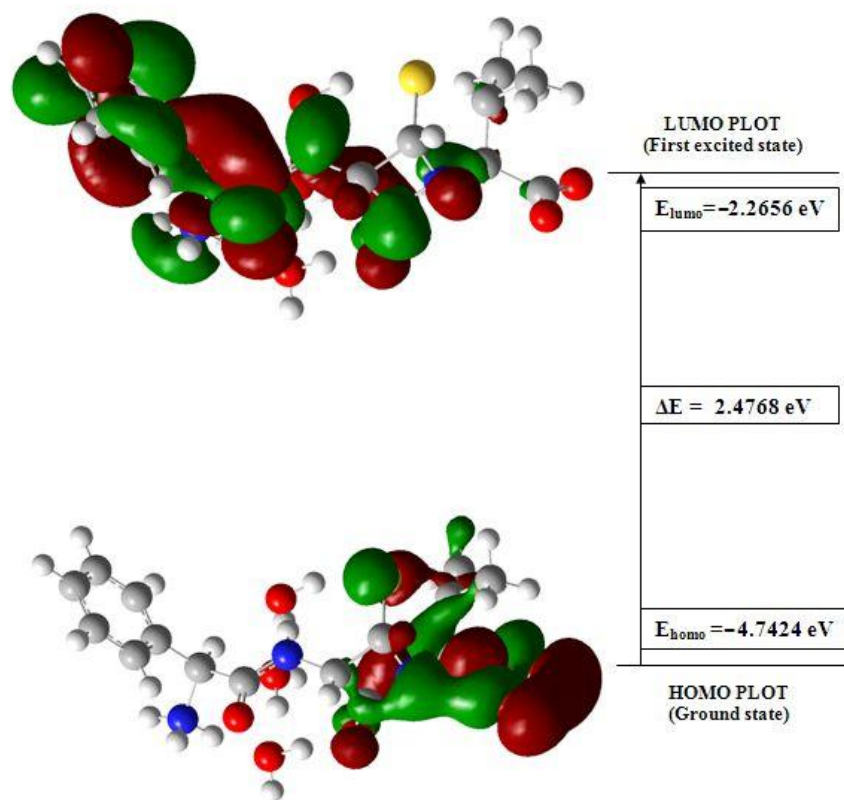

**Fig. S2.** HOMO-LUMO plot of monomer of AT with orbitals involved in electronic transitions in isolated (gaseous) phase.

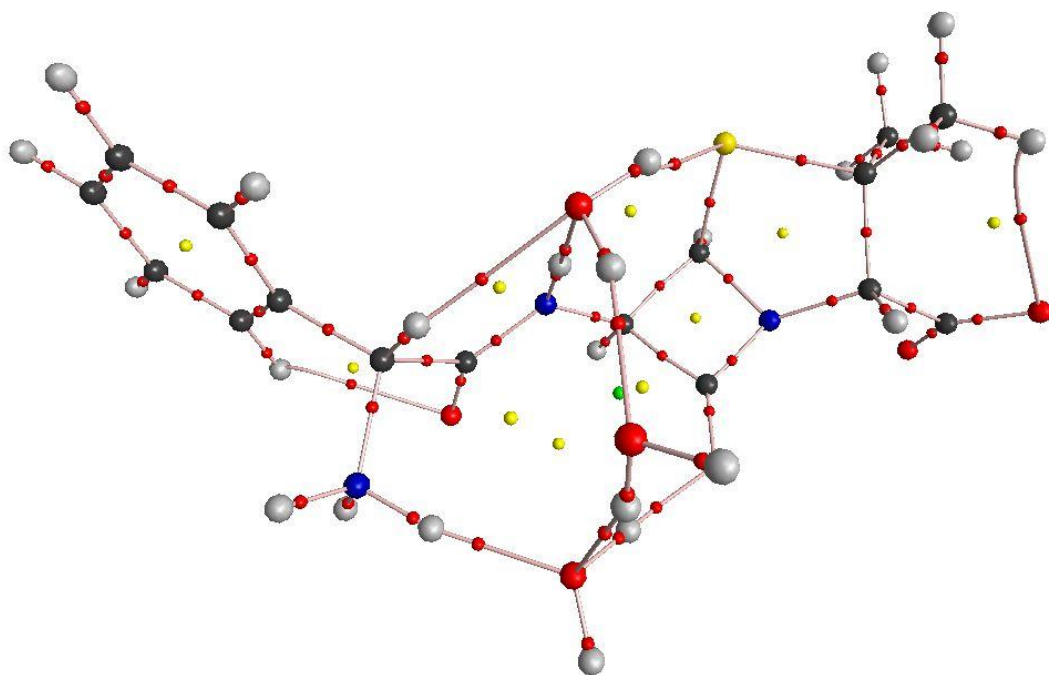

**Fig. S3.** Molecular graph of monomer of AT: bond critical points (small red spheres), ring critical points (small yellow sphere), bond paths (pink lines).

**Table S1** The experimental and calculated geometric parameters of monomer and dimer of AT using DFT/6-311++g(d,p), bond lengths in angstrom (Å) and bond angles and dihedral angles in degrees (°).

| Geometrical Parameters | Experimental | Calculated           |       |
|------------------------|--------------|----------------------|-------|
|                        |              | Optimized parameters |       |
|                        |              | Monomer              | Dimer |
| Bond lengths(Å)        |              |                      |       |
| S1-C9                  | 1.859        | 1.926                | 1.919 |
| S1-C11                 | 1.797        | 1.837                | 1.830 |
| O2-C13                 | 1.201        | 1.229                | 1.221 |
| O3-C16                 | 1.222        | 1.239                | 1.223 |
| O4-C16                 | 1.273        | 1.245                | 1.278 |
| O5-C17                 | 1.213        | 1.229                | 1.226 |
| N6-C10                 | 1.473        | 1.459                | 1.475 |
| N6-C11                 | 1.506        | 1.467                | 1.485 |
| N6-C13                 | 1.384        | 1.339                | 1.355 |
| N7-C12                 | 1.433        | 1.445                | 1.447 |
| N7-C17                 | 1.348        | 1.341                | 1.350 |
| N7-H42                 | 1.002        | 1.026                | 1.028 |
| N8-C18                 | 1.475        | 1.525                | 1.520 |
| N8-H29                 | 1.001        | 1.056                | 1.064 |
| N8-H30                 | 1.000        | 1.027                | 1.026 |
| N8-H31                 | 1.000        | 1.020                | 1.020 |
| C9-C10                 | 1.576        | 1.570                | 1.551 |
| C9-C14                 | 1.511        | 1.535                | 1.532 |
| C9-C15                 | 1.493        | 1.527                | 1.529 |
| C10-C16                | 1.555        | 1.597                | 1.581 |
| C10-H25                | 1.000        | 1.092                | 1.093 |

|         |       |       |       |
|---------|-------|-------|-------|
| C11-C12 | 1.570 | 1.560 | 1.566 |
| C11-H26 | 1.000 | 1.089 | 1.089 |
| C12-C13 | 1.534 | 1.554 | 1.552 |
| C12-H27 | 1.001 | 1.088 | 1.088 |
| C14-H36 | 1.080 | 1.092 | 1.092 |
| C14-H37 | 1.081 | 1.092 | 1.091 |
| C14-H38 | 1.083 | 1.091 | 1.090 |
| C15-H39 | 1.081 | 1.093 | 1.092 |
| C15-H40 | 1.078 | 1.093 | 1.093 |
| C15-H41 | 1.076 | 1.093 | 1.092 |
| C17-C18 | 1.530 | 1.544 | 1.544 |
| C18-C19 | 1.527 | 1.512 | 1.514 |
| C18-H28 | 1.080 | 1.089 | 1.089 |
| C19-C20 | 1.387 | 1.399 | 1.399 |
| C19-C24 | 1.390 | 1.401 | 1.401 |
| C20-C21 | 1.385 | 1.393 | 1.393 |
| C20-H32 | 1.078 | 1.085 | 1.085 |
| C21-C22 | 1.376 | 1.393 | 1.393 |
| C21-H33 | 1.079 | 1.084 | 1.084 |
| C22-C23 | 1.384 | 1.395 | 1.395 |
| C22-H43 | 1.081 | 1.084 | 1.084 |
| C23-C24 | 1.386 | 1.392 | 1.392 |
| C23-H34 | 1.079 | 1.084 | 1.084 |
| C24-H35 | 1.080 | 1.084 | 1.084 |
| O44-H45 | 0.980 | 0.969 | 0.966 |
| O44-H46 | 0.980 | 0.977 | 0.983 |
| O47-H48 | 0.980 | 0.962 | 0.977 |
| O47-H49 | 0.980 | 0.970 | 0.974 |
| O50-H51 | 0.980 | 1.012 | 0.982 |
| O50-H52 | 0.980 | 0.964 | 0.977 |

---

Bond angles(°)

---

|             |        |        |        |
|-------------|--------|--------|--------|
| C9-S1-C11   | 90.10  | 88.75  | 89.26  |
| C10-N6-C11  | 117.04 | 120.03 | 118.63 |
| C10-N6-C13  | 128.12 | 132.81 | 125.75 |
| C11-N6-C13  | 93.09  | 95.33  | 94.30  |
| C12-N7-C17  | 123.25 | 120.25 | 119.69 |
| C12-N7-H42  | 118.51 | 117.56 | 117.63 |
| C17-N7-H42  | 118.09 | 116.35 | 116.24 |
| C18-N8-H29  | 109.66 | 109.71 | 109.45 |
| C18-N8-H30  | 109.54 | 106.77 | 107.78 |
| C18-N8-H31  | 109.72 | 111.56 | 111.42 |
| H29-N8-H30  | 109.40 | 106.88 | 107.50 |
| H29-N8-H31  | 108.93 | 111.27 | 110.66 |
| H30-N8-H31  | 109.57 | 110.42 | 109.88 |
| S1-C9-C10   | 104.63 | 105.65 | 102.91 |
| S1-C9-C14   | 109.99 | 107.26 | 108.43 |
| S1-C9-C15   | 107.54 | 109.11 | 108.36 |
| C10-C9-C14  | 111.85 | 113.13 | 114.70 |
| C10-C9-C15  | 112.88 | 110.91 | 111.01 |
| C14-C9-C15  | 109.73 | 110.51 | 110.90 |
| N6-C10-C9   | 105.59 | 105.72 | 105.44 |
| N6-C10-C16  | 112.80 | 114.64 | 113.06 |
| N6-C10-H25  | 103.84 | 107.15 | 106.41 |
| C9-C10-C16  | 114.33 | 111.64 | 116.61 |
| C9-C10-H25  | 112.00 | 109.74 | 107.16 |
| C16-C10-H25 | 107.84 | 107.79 | 107.55 |

|             |        |        |        |
|-------------|--------|--------|--------|
| S1-C11-N6   | 103.63 | 102.96 | 104.56 |
| S1-C11-C12  | 119.49 | 121.84 | 123.28 |
| S1-C11-H26  | 108.63 | 110.87 | 110.40 |
| N6-C11-C12  | 87.12  | 87.61  | 88.07  |
| N6-C11-H26  | 116.82 | 114.85 | 113.68 |
| C12-C11-H26 | 118.73 | 115.58 | 114.10 |
| N7-C12-C11  | 116.49 | 119.71 | 118.97 |
| N7-C12-C13  | 115.51 | 112.87 | 111.25 |
| N7-C12-H27  | 112.92 | 109.76 | 109.96 |
| C11-C12-C13 | 85.12  | 83.64  | 83.85  |
| C11-C12-H27 | 108.02 | 113.95 | 114.82 |
| C13-C12-H27 | 115.79 | 114.88 | 115.90 |
| O2-C13-N6   | 130.95 | 133.19 | 131.70 |
| O2-C13-C12  | 135.44 | 133.74 | 133.96 |
| N6-C13-C12  | 93.01  | 92.57  | 93.50  |
| C9-C14-H36  | 109.39 | 110.24 | 109.64 |
| C9-C14-H37  | 109.15 | 108.81 | 109.78 |
| C9-C14-H38  | 109.77 | 112.27 | 112.44 |
| H36-C14-H37 | 109.28 | 109.19 | 109.46 |
| H36-C14-H38 | 109.57 | 108.96 | 108.95 |
| H37-C14-H38 | 109.66 | 107.27 | 106.46 |
| C9-C15-H39  | 109.44 | 111.73 | 112.03 |
| C9-C15-H40  | 109.42 | 107.49 | 109.19 |
| C9-C15-H41  | 109.34 | 111.50 | 110.91 |
| H39-C15-H40 | 109.99 | 108.23 | 108.03 |
| H39-C15-H41 | 109.43 | 108.92 | 108.75 |
| H40-C15-H41 | 109.19 | 108.83 | 107.77 |
| O3-C16-O4   | 126.34 | 132.86 | 128.93 |
| O3-C16-C10  | 117.97 | 115.33 | 117.77 |
| O4-C16-C10  | 115.59 | 111.77 | 113.29 |
| O5-C17-N7   | 124.53 | 126.78 | 126.00 |
| O5-C17-C18  | 122.14 | 118.13 | 118.83 |
| N7-C17-C18  | 113.21 | 114.96 | 115.12 |
| N8-C18-C17  | 109.99 | 101.81 | 103.33 |
| N8-C18-C19  | 112.88 | 111.08 | 111.33 |
| N8-C18-H28  | 107.88 | 106.85 | 106.75 |
| C17-C18-C19 | 110.10 | 115.45 | 114.57 |
| C17-C18-H28 | 109.00 | 110.94 | 110.59 |
| C19-C18-H28 | 106.83 | 110.10 | 109.82 |
| C18-C19-C20 | 119.50 | 118.69 | 118.72 |
| C18-C19-C24 | 120.59 | 121.74 | 121.72 |
| C20-C19-C24 | 119.49 | 119.56 | 119.54 |
| C19-C20-C21 | 119.83 | 120.23 | 120.26 |
| C19-C20-H32 | 119.98 | 119.78 | 119.80 |
| C21-C20-H32 | 119.98 | 119.96 | 119.92 |
| C20-C21-C22 | 120.09 | 120.01 | 120.00 |
| C20-C21-H33 | 119.43 | 119.74 | 119.75 |
| C22-C21-H33 | 119.58 | 120.23 | 120.24 |
| C21-C22-C23 | 119.52 | 119.96 | 119.95 |
| C21-C22-H43 | 120.32 | 120.03 | 120.04 |
| C23-C22-H43 | 119.99 | 119.99 | 120.00 |
| C22-C23-C24 | 119.84 | 120.27 | 120.27 |
| C22-C23-H34 | 120.06 | 120.08 | 120.07 |
| C24-C23-H34 | 120.08 | 119.63 | 119.64 |
| C19-C24-C23 | 119.99 | 119.94 | 119.94 |
| C19-C24-H35 | 119.90 | 120.11 | 120.16 |

|             |        |        |        |
|-------------|--------|--------|--------|
| C23-C24-H35 | 119.87 | 119.92 | 119.87 |
| C18-H28-H44 | 143.37 | 144.63 | 143.74 |
| H45-O44-H46 | 112.78 | 107.06 | 106.12 |
| H48-O47-H49 | 128.40 | 106.39 | 104.80 |
| H51-O50-H52 | 102.90 | 105.43 | 103.53 |

---

Dihedral angles(°)

---

|                |         |         |         |
|----------------|---------|---------|---------|
| C11-S1-C9-C10  | -39.79  | -34.62  | -40.89  |
| C11-S1-C9-C14  | 80.48   | 86.33   | 81.00   |
| C11-S1-C9-C15  | -160.05 | -153.93 | -158.53 |
| C9-S1-C11-N6   | 37.10   | 36.16   | 31.65   |
| C9-S1-C11-C12  | 131.56  | 131.49  | 129.07  |
| C9-S1-C11-H26  | -87.76  | -87.15  | -90.98  |
| C11-N6-C10-C9  | -2.60   | 6.40    | -15.80  |
| C11-N6-C10-C16 | -128.13 | -117.00 | -144.32 |
| C11-N6-C10-H25 | 115.38  | 123.42  | 97.81   |
| C13-N6-C10-C9  | -121.11 | -126.61 | -135.70 |
| C13-N6-C10-C16 | 113.35  | 109.97  | 95.77   |
| C13-N6-C10-H25 | -3.12   | -9.59   | -22.08  |
| C10-N6-C11-S1  | -26.46  | -32.48  | -15.17  |
| C10-N6-C11-C12 | -146.13 | -154.65 | -139.13 |
| C10-N6-C11-H26 | 92.94   | 88.15   | 105.30  |
| C13-N6-C11-S1  | 109.72  | 114.91  | 119.95  |
| C13-N6-C11-C12 | -9.94   | -7.24   | -4.00   |
| C13-N6-C11-H26 | -130.86 | -124.44 | -119.56 |
| C10-N6-C13-O2  | -33.49  | -24.75  | -36.16  |
| C10-N6-C13-C12 | 138.56  | 147.80  | 134.31  |
| C11-N6-C13-O2  | -161.88 | -165.28 | -166.43 |
| C11-N6-C13-C12 | -161.88 | 7.27    | 4.04    |
| C17-N7-C12-C11 | 136.04  | 168.59  | 173.39  |
| C17-N7-C12-C13 | -126.32 | -95.52  | -91.78  |
| C17-N7-C12-H27 | 10.17   | 34.02   | 38.01   |
| H42-N7-C12-C11 | -48.45  | -39.26  | -35.76  |
| H42-N7-C12-C13 | 49.16   | 56.60   | 59.05   |
| H42-N7-C12-H27 | -174.33 | -173.83 | -171.14 |
| C12-N7-C17-O5  | 0.30    | -15.83  | -15.36  |
| C12-N7-C17-C18 | -175.90 | 160.06  | 162.48  |
| H42-N7-C17-O5  | -175.20 | -168.29 | -166.59 |
| H42-N7-C17-C18 | 8.58    | 7.60    | 11.25   |
| H29-N8-C18-C17 | 59.61   | 64.28   | 66.79   |
| H29-N8-C18-C19 | -176.97 | -172.25 | -169.74 |
| H29-N8-C18-H28 | -59.16  | -52.13  | -49.88  |
| H30-N8-C18-C17 | -60.45  | -51.19  | -49.84  |
| H30-N8-C18-C19 | 62.95   | 72.25   | 73.62   |
| H30-N8-C18-H28 | -179.24 | -167.62 | -166.51 |
| H31-N8-C18-C17 | 179.22  | -171.92 | -170.48 |
| H31-N8-C18-C19 | -57.37  | -48.47  | -47.01  |
| H31-N8-C18-H28 | 60.43   | 71.64   | 72.84   |
| S1-C9-C10-N6   | 29.56   | 21.82   | 37.32   |
| S1-C9-C10-C16  | 154.15  | 147.11  | 163.70  |
| S1-C9-C10-H25  | -82.80  | -93.42  | -75.76  |
| C14-C9-C10-N6  | -89.47  | -95.22  | -80.23  |
| C14-C9-C10-C16 | 35.11   | 30.06   | 46.14   |
| C14-C9-C10-H25 | 158.15  | 149.52  | 166.67  |
| C15-C9-C10-N6  | 146.19  | 139.94  | 153.07  |
| C15-C9-C10-C16 | -89.21  | -94.76  | -80.54  |
| C15-C9-C10-H25 | 33.82   | 24.69   | 39.97   |

|                 |         |         |         |
|-----------------|---------|---------|---------|
| S1-C9-C14-H36   | 22.37   | 59.20   | 59.50   |
| S1-C9-C14-H37   | 141.89  | 178.92  | 179.79  |
| S1-C9-C14-H38   | -97.88  | -62.48  | -61.87  |
| C10-C9-C14-H36  | 138.18  | 175.30  | 173.87  |
| C10-C9-C14-H37  | -102.28 | -64.97  | -65.82  |
| C10-C9-C14-H38  | 17.93   | 53.62   | 52.50   |
| C15-C9-C14-H36  | -95.73  | -59.64  | -59.36  |
| C15-C9-C14-H37  | 23.79   | 60.07   | 60.92   |
| C15-C9-C14-H38  | 144.00  | 178.67  | 179.25  |
| S1-C9-C15-H39   | 61.93   | 57.14   | 57.81   |
| S1-C9-C15-H40   | -177.47 | 175.75  | 177.46  |
| S1-C9-C15-H41   | -57.91  | -65.02  | -63.90  |
| C10-C9-C15-H39  | -52.96  | -58.85  | -54.50  |
| C10-C9-C15-H40  | 67.63   | 59.75   | 65.136  |
| C10-C9-C15-H41  | -172.81 | 178.97  | -176.23 |
| C14-C9-C15-H39  | -178.45 | 174.84  | 176.73  |
| C14-C9-C15-H40  | -57.85  | -66.53  | -63.62  |
| C14-C9-C15-H41  | 61.69   | 52.67   | 55.00   |
| N6-C10-C16-O3   | -3.58   | 14.12   | 60.31   |
| N6-C10-C16-O4   | 179.68  | -167.41 | -119.67 |
| C9-C10-C16-O3   | -124.24 | -106.06 | -62.17  |
| C9-C10-C16-O4   | 59.02   | 72.39   | 117.84  |
| H25-C10-C16-O3  | 110.48  | 133.33  | 177.50  |
| H25-C10-C16-O4  | -66.24  | -48.20  | -2.47   |
| S1-C11-C12-N7   | 21.08   | 15.20   | 8.24    |
| S1-C11-C12-C13  | -95.05  | -97.54  | -102.68 |
| S1-C11-C12-H27  | 149.38  | 148.01  | 141.57  |
| N6-C11-C12-N7   | 125.12  | 119.00  | 114.43  |
| N6-C11-C12-C13  | 8.98    | 6.25    | 3.50    |
| N6-C11-C12-H27  | -106.57 | -108.18 | -112.23 |
| H26-C11-C12-N7  | -115.68 | -124.48 | -130.40 |
| H26-C11-C12-C13 | 128.17  | 122.76  | 118.67  |
| H26-C11-C12-H27 | 12.61   | 8.32    | 2.93    |
| N7-C12-C13-O2   | 44.58   | 46.02   | 47.53   |
| N7-C12-C13-N6   | -126.87 | -126.47 | -122.58 |
| C11-C12-C13-O2  | 161.66  | 165.64  | 166.27  |
| C11-C12-C13-N6  | -9.78   | -6.85   | -3.84   |
| H27-C12-C13-O2  | -90.65  | -80.86  | -79.07  |
| H27-C12-C13-N6  | 97.88   | 106.64  | 110.80  |
| O5-C17-C18-N8   | 37.84   | 43.83   | 41.55   |
| O5-C17-C18-C19  | -87.16  | -76.59  | -79.74  |
| O5-C17-C18-H28  | 155.94  | 157.24  | 155.47  |
| N7-C17-C18-N8   | -145.83 | -132.43 | -136.46 |
| N7-C17-C18-C19  | 89.14   | 107.12  | 102.23  |
| N7-C17-C18-H28  | -27.74  | -19.02  | -22.53  |
| N8-C18-C19-C20  | 132.83  | 111.18  | 109.11  |
| N8-C18-C19-C24  | -54.61  | -68.72  | -70.20  |
| C17-C18-C19-C20 | -103.81 | -133.56 | -134.08 |
| C17-C18-C19-C24 | 68.73   | 46.52   | 46.59   |
| H28-C18-C19-C20 | 14.41   | -6.98   | -8.91   |
| H28-C18-C19-C24 | -173.03 | 173.09  | 171.77  |
| N8-C18-H28-O44  | 139.12  | 131.12  | 135.00  |
| C17-C18-H28-O44 | 19.70   | 20.93   | 23.25   |
| C19-C18-H28-O44 | -99.24  | -108.13 | -104.17 |
| C18-C19-C20-C21 | 172.01  | -179.43 | -178.88 |
| C18-C19-C20-H32 | -13.05  | 1.73    | 1.88    |

|                 |         |         |         |
|-----------------|---------|---------|---------|
| C24-C19-C20-C21 | -0.61   | 0.47    | 0.44    |
| C24-C19-C20-H32 | 174.31  | -178.34 | -178.78 |
| C18-C19-C24-C23 | -174.77 | 179.21  | 178.72  |
| C18-C19-C24-H35 | -0.25   | -2.50   | -2.53   |
| C20-C19-C24-C23 | -2.22   | -0.70   | -0.58   |
| C20-C19-C24-H35 | 172.29  | 177.57  | 178.15  |
| C19-C20-C21-C22 | 8.53    | 0.07    | -0.00   |
| C19-C20-C21-H33 | 177.71  | -179.53 | -179.85 |
| H32-C20-C21-C22 | -166.39 | 178.89  | 179.23  |
| H32-C20-C21-H33 | 2.78    | -0.71   | -0.62   |
| C20-C21-C22-C23 | -13.52  | -0.40   | -0.30   |
| C20-C21-C22-H43 | 171.01  | -179.85 | -179.97 |
| H33-C21-C22-C23 | 177.30  | 179.20  | 179.54  |
| H33-C21-C22-H43 | 1.84    | -0.24   | -0.12   |
| C21-C22-C23-C24 | 10.61   | 0.18    | 0.16    |
| C21-C22-C23-H34 | -168.85 | -179.08 | -179.38 |
| H43-C22-C23-C24 | -173.91 | 179.63  | 179.83  |
| H43-C22-C23-H34 | 6.61    | 0.36    | 0.28    |
| C22-C23-C24-C19 | -2.75   | 0.37    | 0.28    |
| C22-C23-C24-H35 | -177.27 | -177.90 | -178.46 |
| H34-C23-C24-C19 | 176.71  | 179.64  | 179.83  |
| H34-C23-C24-H35 | 2.19    | 1.36    | 1.09    |

**Table S2** Selected Lewis orbitals (occupied bond orbital) with percentage ED over bonded atoms ( $ED_X$ ,  $ED_Y$  in %), hybrid NBOs with s and p character in % for monomer of AT.

| Bond (X-Y)<br>( $ED_{X-Y}$ )   | $ED_X$ (%)<br>$ED_Y$ (%) | Hybrid NBOs                                       | s (%)          | p (%)          |
|--------------------------------|--------------------------|---------------------------------------------------|----------------|----------------|
| $\sigma$ (S1-C9)<br>(1.95607)  | 51.19<br>48.81           | $0.7154(sp^{5.86})_S +$<br>$0.6987(sp^{5.70})_C$  | 14.51<br>14.90 | 85.09<br>84.97 |
| $\sigma$ (S1-C11)<br>(1.97627) | 45.65<br>54.35           | $0.6757(sp^{6.30})_S +$<br>$0.7372(sp^{3.20})_C$  | 13.62<br>23.77 | 85.84<br>76.11 |
| $\sigma$ (O2-C13)<br>(1.99479) | 65.53<br>34.47           | $0.8095(sp^{1.55})_{O+}$<br>$0.5871(sp^{2.08})_C$ | 39.25<br>32.46 | 60.65<br>67.38 |
| $\sigma$ (O3-C16)<br>(1.99393) | 64.91<br>35.09           | $0.8057(sp^{1.58})_{O+}$<br>$0.5924(sp^{1.85})_C$ | 38.68<br>35.07 | 61.19<br>64.77 |
| $\sigma$ (O4-C16)<br>(1.99246) | 65.05<br>34.95           | $0.8065(sp^{1.65})_{O+}$<br>$0.5912(sp^{1.84})_C$ | 37.65<br>35.20 | 62.23<br>64.61 |
| $\sigma$ (O5-C17)<br>(1.99250) | 64.49<br>35.51           | $0.8031(sp^{1.49})_{O+}$<br>$0.5959(sp^{2.07})_C$ | 40.17<br>32.51 | 59.71<br>67.33 |
| $\sigma$ (N6-C10)<br>(1.98365) | 65.59<br>34.41           | $0.8099(sp^{1.61})_{N+}$<br>$0.5866(sp^{3.85})_C$ | 38.32<br>20.57 | 61.65<br>79.11 |
| $\sigma$ (N6-C11)<br>(1.97338) | 62.13<br>37.87           | $0.7882(sp^{2.72})_{N+}$<br>$0.6154(sp^{3.76})_C$ | 26.85<br>20.99 | 73.09<br>78.84 |
| $\sigma$ (N6-C13)<br>(1.98493) | 63.02<br>36.98           | $0.7939(sp^{1.98})_{N+}$<br>$0.6081(sp^{2.01})_C$ | 33.49<br>33.17 | 66.44<br>66.73 |
| $\sigma$ (N7-C12)<br>(1.98136) | 62.05<br>37.95           | $0.7877(sp^{2.06})_{N+}$<br>$0.6160(sp^{3.12})_C$ | 32.70<br>24.25 | 67.27<br>75.63 |
| $\sigma$ (N7-C17)<br>(1.98817) | 61.68<br>38.32           | $0.7854(sp^{1.81})_{N+}$<br>$0.6190(sp^{1.88})_C$ | 35.56<br>34.67 | 64.38<br>65.24 |
| $\sigma$ (N7-H42)<br>(1.97566) | 74.07<br>25.93           | $0.8607(sp^{2.54})_{N+}$<br>$0.5092(sp^{0.00})_H$ | 28.23<br>99.91 | 71.72<br>0.09  |
| $\sigma$ (N8-C18)<br>(1.98527) | 65.10<br>34.90           | $0.8068(sp^{2.47})_{N+}$<br>$0.5908(sp^{4.56})_C$ | 28.85<br>17.96 | 71.13<br>81.90 |
| $\sigma$ (N8-H29)<br>(1.99103) | 75.79<br>24.21           | $0.8706(sp^{2.89})_{N+}$<br>$0.4920(sp^{0.00})_H$ | 25.68<br>99.90 | 74.27<br>0.10  |



|                          |       |                                            |       |       |
|--------------------------|-------|--------------------------------------------|-------|-------|
| $\sigma(\text{N8-H30})$  | 72.65 | 0.8523(sp <sup>3.46</sup> ) <sub>N</sub> + | 22.41 | 77.53 |
| (1.99157)                | 27.35 | 0.5230(sp <sup>0.00</sup> ) <sub>H</sub>   | 99.92 | 0.08  |
| $\sigma(\text{N8-H31})$  | 71.21 | 0.8439(sp <sup>3.34</sup> ) <sub>N</sub> + | 23.02 | 76.93 |
| (1.99250)                | 28.79 | 0.5365(sp <sup>0.00</sup> ) <sub>H</sub>   | 99.94 | 0.06  |
| $\sigma(\text{O44-H45})$ | 75.01 | 0.8661(sp <sup>3.00</sup> ) <sub>O</sub> + | 24.99 | 74.92 |
| (1.99673)                | 24.99 | 0.4999(sp <sup>0.00</sup> ) <sub>H</sub>   | 99.89 | 0.11  |
| $\sigma(\text{O44-H46})$ | 76.19 | 0.8728(sp <sup>2.71</sup> ) <sub>O</sub> + | 26.93 | 72.99 |
| (1.99830)                | 23.81 | 0.4880(sp <sup>0.00</sup> ) <sub>H</sub>   | 99.85 | 0.15  |
| $\sigma(\text{O47-H48})$ | 74.00 | 0.8602(sp <sup>3.22</sup> ) <sub>O</sub> + | 23.70 | 76.21 |
| (1.99846)                | 26.00 | 0.5099(sp <sup>0.00</sup> ) <sub>H</sub>   | 99.90 | 0.10  |
| $\sigma(\text{O47-H49})$ | 75.67 | 0.8699(sp <sup>2.77</sup> ) <sub>O</sub> + | 26.53 | 73.38 |
| (1.99843)                | 24.33 | 0.4933(sp <sup>0.00</sup> ) <sub>H</sub>   | 99.85 | 0.15  |
| $\sigma(\text{O50-H51})$ | 79.20 | 0.8900(sp <sup>2.40</sup> ) <sub>O</sub> + | 29.40 | 70.52 |
| (1.99659)                | 20.80 | 0.4560(sp <sup>0.00</sup> ) <sub>H</sub>   | 99.81 | 0.19  |
| $\sigma(\text{O50-H52})$ | 74.58 | 0.8636(sp <sup>3.36</sup> ) <sub>O</sub> + | 22.91 | 77.00 |
| (1.99789)                | 25.42 | 0.5042(sp <sup>0.00</sup> ) <sub>H</sub>   | 99.92 | 0.08  |

**Table S3** Calculated static dipole moment ( $\mu_0$ ), the mean polarizability ( $\langle\alpha_0\rangle$ ), the anisotropy of the polarizability ( $\Delta\alpha$ ), the mean first order hyperpolarizability ( $\beta_0$ ) and their components for monomer and dimer of AT, using B3LYP/6–311++G(d,p).

| Property       | Monomer                              | Dimer                                | Property      | Monomer                             | Dimer                               |
|----------------|--------------------------------------|--------------------------------------|---------------|-------------------------------------|-------------------------------------|
| $\mu_x$        | 23.5241 Debye                        | 13.6220 Debye                        | $\beta_{xxx}$ | 817.8269 a.u.                       | 421.0636 a.u.                       |
| $\mu_y$        | 2.8235 Debye                         | 4.2407 Debye                         | $\beta_{xyy}$ | 71.7618 a.u.                        | 423.8009 a.u.                       |
| $\mu_z$        | 5.4360 Debye                         | 0.6309 Debye                         | $\beta_{xzz}$ | 28.8111 a.u.                        | -2.2618 a.u.                        |
| $\mu_0$        | <b>24.3085 Debye</b>                 | <b>14.2807 Debye</b>                 | $\beta_{yyy}$ | 165.0919 a.u.                       | 209.9770 a.u.                       |
| $\alpha_{xx}$  | -222.2791 a.u.                       | -379.2294 a.u.                       | $\beta_{xxy}$ | -101.8628 a.u.                      | -192.1753 a.u.                      |
| $\alpha_{yy}$  | -147.4717 a.u.                       | -386.3897 a.u.                       | $\beta_{yzz}$ | 11.8080 a.u.                        | 5.9548 a.u.                         |
| $\alpha_{zz}$  | -172.4446 a.u.                       | -313.8598 a.u.                       | $\beta_{zzz}$ | 59.2442 a.u.                        | 119.5703 a.u.                       |
| $\alpha_{xy}$  | 27.4927 a.u.                         | 117.6228 a.u.                        | $\beta_{xxz}$ | 95.8612 a.u.                        | -0.7569 a.u.                        |
| $\alpha_{xz}$  | -19.4991 a.u.                        | 0.5393 a.u.                          | $\beta_{yyz}$ | 32.1325 a.u.                        | -84.0154 a.u.                       |
| $\alpha_{yz}$  | 10.1137 a.u.                         | -8.5047 a.u.                         | $\beta_{xyz}$ | -21.4163 a.u.                       | -10.3840 a.u.                       |
| $ \alpha_0 $   | <b>-26.7844*10<sup>-24</sup> esu</b> | <b>-53.3262*10<sup>-24</sup> esu</b> | $\beta_0$     | <b>8.12345*10<sup>-30</sup> esu</b> | <b>7.28859*10<sup>-30</sup> esu</b> |
| $\Delta\alpha$ | <b>9.77629*10<sup>-24</sup> esu</b>  | <b>10.2596*10<sup>-24</sup> esu</b>  |               |                                     |                                     |

**Table S4** Theoretically calculated thermodynamic properties at different temperatures using 6-311++G(d,p) basis set for monomer of AT.

| Temperature (K) | Enthalpy (kcal/mol) | Specific Heat (cal/mol K) | Entropy (cal/mol K) |
|-----------------|---------------------|---------------------------|---------------------|
| 100             | 265.501             | 49.191                    | 113.875             |
| 125             | 266.844             | 58.139                    | 126.267             |
| 150             | 141.535             | 43.703                    | 118.812             |
| 175             | 142.687             | 48.537                    | 126.217             |
| 200             | 272.137             | 82.610                    | 159.924             |
| 300             | 281.935             | 113.031                   | 200.040             |
| 400             | 294.649             | 140.615                   | 236.999             |
| 500             | 309.911             | 163.847                   | 271.401             |

**Table S5** Theoretically calculated total energy (eV), zero-point energy (J/mol), enthalpy (kcal/mol), specific heat (cal/mol K), entropy (cal/mol K) and rotational constants (GHz) at 298.15 K at the B3LYP/6–311++G(d,p) level for monomer and dimer of AT.

| Parameters        | Monomer   | Dimer     |
|-------------------|-----------|-----------|
| Total energy      | -46645.79 | -93293.60 |
| Zero point energy | 1098890.2 | 2201135.6 |
| Enthalpy          | 281.726   | 564.986   |

|                      |         |         |
|----------------------|---------|---------|
| Specific heat        | 112.487 | 228.767 |
| Entropy              | 199.336 | 353.758 |
| Rotational constants | 0.31995 | 0.04870 |
|                      | 0.08833 | 0.03280 |
|                      | 0.08430 | 0.02326 |

**Table S6** Geometrical parameters for intra and inter molecular hydrogen bonds in dimer of AT: bond length (Å), bond angle ( $^{\circ}$ ) and sum of van der Waal radii of interacting atoms ( $r_H + r_A$ ) in Å.

| D-H...A         | D-H (Å) | H...A (Å) | D-H...A ( $^{\circ}$ ) | ( $r_H + r_A$ ) (Å) |
|-----------------|---------|-----------|------------------------|---------------------|
| N7-H42...O44    | 1.0281  | 1.8707    | 167.26                 | 2.72                |
| N8-H29...O50    | 1.0644  | 1.6493    | 164.16                 | 2.72                |
| C24-H35...O5    | 1.0841  | 2.5531    | 117.77                 | 2.72                |
| O44-H45...S1    | 0.9659  | 2.7588    | 130.37                 | 3.00                |
| C14-H37...O3    | 1.0908  | 2.4918    | 104.02                 | 2.72                |
| N53-H84...O4    | 1.1192  | 1.4558    | 170.15                 | 2.72                |
| N53-H83...O2    | 1.0268  | 2.1177    | 142.67                 | 2.72                |
| O50-H51...O2    | 0.9817  | 1.7948    | 164.10                 | 2.72                |
| C18-H28...O44   | 1.0887  | 2.3330    | 143.75                 | 2.72                |
| N53-H82...O47   | 1.0292  | 2.1158    | 157.88                 | 2.72                |
| O44-H46...O47   | 0.9835  | 1.7874    | 168.19                 | 2.72                |
| O47-H48...O54   | 0.9774  | 1.8896    | 166.97                 | 2.72                |
| O47-H49...O50   | 0.9740  | 2.0631    | 153.87                 | 2.72                |
| O50-H52...O59   | 0.9773  | 1.8935    | 143.11                 | 2.72                |
| N61-H95...O97   | 1.0290  | 1.8539    | 169.63                 | 2.72                |
| C71-H81...O97   | 1.0896  | 2.4895    | 141.98                 | 2.72                |
| O97-H99...O100  | 0.9792  | 1.8083    | 173.48                 | 2.72                |
| O100-H102...O54 | 0.9768  | 1.8447    | 167.33                 | 2.72                |
| O54-H103...O56  | 0.9886  | 1.7134    | 156.13                 | 2.72                |
| C77-H88...O59   | 1.0840  | 2.6590    | 112.71                 | 2.72                |
| O97-H98...S55   | 0.9687  | 2.5735    | 140.43                 | 3.00                |

**Table S7** Theoretical and experimental vibrational wavenumbers ( $\text{cm}^{-1}$ ) of AT with potential energy distribution (PED).

| Frequency monomer ( $\text{cm}^{-1}$ ) |              |       |       | Potential Energy Distribution ( $\geq 5\%$ )       | Calc. Scaled               | Simplified description of modes of dimer |
|----------------------------------------|--------------|-------|-------|----------------------------------------------------|----------------------------|------------------------------------------|
| Calculated                             | Experimental |       |       |                                                    | Freq. ( $\text{cm}^{-1}$ ) |                                          |
| Unscaled                               | Scaled       | Raman | FT-IR | Dimer                                              |                            |                                          |
| 3878                                   | 3666         | -     | -     | $\nu_a(\text{O47H}_2)(100)$                        | 3675, 3492                 | OH <sub>2</sub> asym stretch             |
| 3849                                   | 3641         | -     | -     | $\nu_a(\text{O50H}_2)(99)$                         | 3656, 3334                 | OH <sub>2</sub> asym stretch             |
| 3757                                   | 3560         | -     | 3506  | $\nu_a(\text{O44H}_2)(100)$                        | 3549, 3286                 | OH <sub>2</sub> asym stretch             |
| 3645                                   | 3460         | -     | 3442  | $\nu_s(\text{O47H}_2)(91)+\nu_s(\text{O44H}_2)(6)$ | 3431, 3403                 | OH <sub>2</sub> sym stretch              |
| 3573                                   | 3396         | -     | -     | $\nu_s(\text{O44H}_2)(90)+\nu_s(\text{O47H}_2)(7)$ | 3427, 3361                 | OH <sub>2</sub> sym stretch              |
| 3516                                   | 3345         | -     | 3367  | $\nu_a(\text{NH}_3)(99)$                           | 3340, 3247                 | NH <sub>3</sub> asym stretch             |
| 3391                                   | 3233         | -     | 3207  | $\nu_s(\text{NH}_3)(99)$                           | 3250, 3186                 | NH <sub>3</sub> sym stretch              |
| 3323                                   | 3172         | -     | 3207  | $\nu(\text{NH}_4)(95)$                             | 3139, 3129                 | NH stretch                               |
| 3198                                   | 3059         | 3089  | 3039  | R3[ $\nu(\text{CH})$ ](96)                         | 3060, 3056                 | Ring 3 CH stretch                        |
| 3190                                   | 3052         | 3045  | 3039  | R3[ $\nu(\text{CH})$ ](98)                         | 3052, 3049                 | Ring 3 CH stretch                        |
| 3182                                   | 3045         | 3045  | 3039  | R3[ $\nu(\text{CH})$ ](99)                         | 3044, 3042                 | Ring 3 CH stretch                        |
| 3174                                   | 3038         | 3045  | 3039  | R3[ $\nu(\text{CH})$ ](99)                         | 3038, 3036                 | Ring 3 CH stretch                        |
| 3168                                   | 3032         | 3024  | 3039  | R3[ $\nu(\text{CH})$ ](97)                         | 3033, 3030                 | Ring 3 CH stretch                        |
| 3129                                   | 2997         | 2996  | 2991  | R2[ $\nu(\text{CH}_2)$ ](97)                       | 2997, 2985                 | Ring 3 CH stretch                        |
| 3125                                   | 2993         | 2996  | 2991  | $\nu(\text{CH}_2)(94)$                             | 2993, 2981                 | Ring 3 CH stretch                        |
| 3118                                   | 2987         | 2985  | 2991  | $\nu_a(\text{C14H}_3)(98)$                         | 2993, 2983                 | CH <sub>3</sub> asymstr                  |

|      |      |      |      |                                                                                                                                                                                            |            |                                      |
|------|------|------|------|--------------------------------------------------------------------------------------------------------------------------------------------------------------------------------------------|------------|--------------------------------------|
| 3111 | 2981 | 2958 | 2991 | $\nu_a(\text{C14H}_3)(95)$                                                                                                                                                                 | 2989, 2980 | CH <sub>3</sub> asymstr              |
| 3104 | 2974 | 2976 | -    | R1[ $\nu(\text{CH26})$ ](95)                                                                                                                                                               | 2970, 2954 | CH stretch                           |
| 3099 | 2970 | 2971 | 2970 | $\nu_a(\text{C15H}_3)(95)$                                                                                                                                                                 | 2976, 2973 | CH <sub>3</sub> asymstr              |
| 3091 | 2963 | 2971 |      | $\nu_a(\text{C15H}_3)(96)$                                                                                                                                                                 | 2970, 2966 | CH <sub>3</sub> asymstr              |
| 3071 | 2944 | 2939 | 2929 | R1[ $\nu(\text{CH25})$ ](98)                                                                                                                                                               | 2921, 2921 | CH stretch                           |
| 3040 | 2916 | 2935 | 2929 | $\nu_s(\text{C14H}_3)(98)$                                                                                                                                                                 | 2924, 2909 | CH <sub>3</sub> symstr               |
| 3022 | 2900 | 2907 | -    | $\nu_s(\text{C15H}_3)(98)$                                                                                                                                                                 | 2915, 2902 | CH <sub>3</sub> symstr               |
| 2992 | 2872 | 2866 | 2866 | $\nu(\text{OH51})(60)+\nu(\text{NH}_3)(37)$                                                                                                                                                | 2707       | OH stretch                           |
| 2861 | 2753 | 2754 | 2742 | $\nu(\text{NH}_3)(60)+\nu(\text{OH51})(38)$                                                                                                                                                | 2666       | NH <sub>3</sub> str                  |
| 1764 | 1729 | 1777 | 1768 | R2[ $\nu(\text{C=O})(53)+\nu(\text{CN})(17)+\nu(\text{CC13})(4)+\nu(\text{C=O5})(7)$                                                                                                       | 1745, 1737 | In plane C=O str                     |
| 1737 | 1703 | 1691 | 1685 | $\nu_a(\text{C16O}_2)(91)+\text{R1}[\rho(\text{CC16})](5)$                                                                                                                                 | 1712, 1699 | CO <sub>2</sub> symmetric str        |
| 1735 | 1701 | 1691 | 1685 | $\nu(\text{C=O5})(36)+\rho(\text{C=O5})(11)+\nu(\text{C17N})(8)+\text{R2}[\nu(\text{C=O})](5)+\delta(\text{N7H42O44})(5)$                                                                  | 1705, 1686 | C=O str + C=O rock                   |
| 1699 | 1667 | 1691 | 1685 | $\delta_a(\text{NH}_3)(27)+\tau(\text{O2H51})(23)+\text{R2}[\delta(\text{C13O2H51})](17)+\delta(\text{O50H49})(15)+\tau(\text{H29O50})(8)+\delta(\text{N8H29O50})(5)$                      | 1668, 1638 | NH <sub>3</sub> scissoring           |
| 1679 | 1648 | -    | -    | $\delta_a(\text{NH}_3)(24)+\tau(\text{O2H51})(18)+\delta(\text{N8H29O50})(15)+\text{R2}[\delta(\text{C13O2H51})](13)+\delta(\text{O50H49})(12)+\tau(\text{H29O50})(7)$                     | 1648, 1624 | NH <sub>3</sub> asym deformation     |
| 1658 | 1628 | -    | 1624 | $\delta(\text{O44H42})(33)+\delta(\text{O44H46O47})(28)+\delta(\text{O47H46})(17)+\tau(\text{H46O47})(8)+\delta(\text{O47H49O50})(6)$                                                      | 1625, 1619 | OH deformation                       |
| 1644 | 1614 | 1607 | 1606 | $\delta(\text{N8H29O50})(33)+\rho(\text{NH}_3)(13)+\delta'_a(\text{NH}_3)(12)+\delta_s(\text{NH}_3)(5)+\text{R3}[\nu(\text{C20C21})(5)+\nu(\text{C23C24})(5)]$                             | 1607, 1595 | NHO deformation                      |
| 1639 | 1609 | 1607 | 1606 | $\delta(\text{N8H29O50})(33)+\rho(\text{NH}_3)(12)+\delta'_a(\text{NH}_3)(12)+\text{R3}[\nu(\text{C23C24})(5)+\nu(\text{C20C21})(5)]+\delta_s(\text{NH}_3)(5)$                             | 1619, 1579 | NHO deformation                      |
| 1629 | 1600 | 1607 | 1606 | $\delta(\text{O47H46})(30)+\delta(\text{O47H49O50})(17)+\delta(\text{N8H29O50})(11)+\delta(\text{O44H42})(9)+\delta(\text{O44H46O47})(7)+\rho(\text{NH}_3)(6)+\delta'_a(\text{NH}_3)(5)$   | 1607, 1596 | OH deformation                       |
| 1624 | 1595 | 1594 | 1606 | R3[ $\nu(\text{CC})(61)+\delta_{in}(\text{C22H})(9)+\delta'_a(8)+\rho'(\text{C18H})(5)$                                                                                                    | 1598, 1595 | Ring 3 CC stretch                    |
| 1607 | 1579 | 1594 | 1572 | $\rho(\text{N7H})(42)+\delta(\text{N7H42O44})(31)+\tau(\text{H42O44})(12)+\nu(\text{C17N})(5)$                                                                                             | 1579, 1571 | NH rock                              |
| 1526 | 1502 | -    | -    | R3[ $\delta_{in}(\text{CH})(62)+\nu(\text{CC})(32)]$                                                                                                                                       | 1503, 1501 | In plane ring def                    |
| 1519 | 1495 | -    | 1493 | $\delta_s(\text{NH}_3)(59)+\delta(\text{N8H29O50})(28)+\delta'_a(\text{NH}_3)(6)$                                                                                                          | 1538, 1511 | NH <sub>3</sub> symdef               |
| 1511 | 1487 | -    | 1493 | $\delta_a(\text{C14H}_3)(31)+\delta_a(\text{C15H}_3)(31)+\delta'_a(\text{C14H}_3)(23)+\rho(\text{C14H}_3)(5)$                                                                              | 1486, 1477 | CH <sub>3</sub> asymdef              |
| 1496 | 1473 | -    | 1458 | $\delta'_a(\text{C15H}_3)(28)+\delta_a(\text{C14H}_3)(27)+\delta_a(\text{C15H}_3)(24)+\delta'_a(\text{C14H}_3)(8)+\rho'(\text{C15H}_3)(5)$                                                 | 1476, 1476 | CH <sub>3</sub> asymdef              |
| 1492 | 1468 | 1466 | 1458 | $\delta'_a(\text{C15H}_3)(30)+\delta_a(\text{C15H}_3)(29)+\delta'_a(\text{C14H}_3)(21)+\delta_a(\text{C14H}_3)(11)$                                                                        | 1467, 1455 | CH <sub>3</sub> asymdef              |
| 1490 | 1467 | 1466 | 1458 | $\rho'(\text{C18H})(23)+\text{R3}[\delta_{in}(\text{CH})(33)+\nu(\text{CC})(23)]+\rho(\text{C18H})(5)$                                                                                     | 1467, 1466 | CH rocking                           |
| 1474 | 1452 | 1438 | 1458 | $\delta'_a(\text{C14H}_3)(37)+\delta'_a(\text{C15H}_3)(27)+\delta_a(\text{C14H}_3)(19)+\delta_a(\text{C15H}_3)(8)$                                                                         | 1454, 1453 | CH <sub>3</sub> asymdef              |
| 1424 | 1403 | 1405 | 1402 | $\delta_s(\text{C14H}_3)(33)+\text{R2}[\nu(\text{CN})(15)+\delta_{in}(\text{C=O})(11)]+\text{R1}[\nu(\text{C10N})](6)+\delta_s(\text{C15H}_3)(6)$                                          | 1410, 1403 | CH <sub>3</sub> symdef               |
| 1420 | 1400 | 1405 | 1402 | $\delta_s(\text{C14H}_3)(27)+\text{R2}[\nu(\text{CN})(17)+\delta_{in}(\text{C=O})(14)+\delta(\text{C13O2H51})(5)]+\text{R1}[\nu(\text{C10N})](7)+\delta_s(\text{C15H}_3)(6)$               | 1400, 1390 | CH <sub>3</sub> symdef               |
| 1405 | 1385 | 1387 | 1385 | $\rho(\text{C18H})(44)+\delta(\text{C18H28O44})(38)$                                                                                                                                       | 1393, 1392 | CH rocking                           |
| 1398 | 1379 | 1379 | 1373 | $\rho'(\text{C18H})(51)+\delta(\text{C18H28O44})(13)+\rho(\text{C18H})(5)$                                                                                                                 | 1376, 1371 | CH rocking                           |
| 1396 | 1376 | 1379 | 1361 | $\delta_s(\text{C15H}_3)(73)+\delta_s(\text{C14H}_3)(16)+\text{R1}[\nu(\text{CC15})](6)$                                                                                                   | 1380, 1390 | CH <sub>3</sub> symdef               |
| 1366 | 1348 | -    | 1361 | R1[ $\omega(\text{C10CH})(32)+\gamma(\text{C10CH})(22)+\delta(\text{C16CH})(5)]+\text{R2}[\delta(\text{N7C12H})](7)+\nu(\text{C11N})(5)$                                                   | 1365, 1345 | CCH wagging                          |
| 1357 | 1339 | 1337 | 1334 | R3[ $\delta_{in}(\text{CH})(37)+\nu(\text{CC})(27)]+\rho'(\text{C18H})(8)+\rho(\text{C18H})(7)$                                                                                            | 1338, 1338 | In plane ring def                    |
| 1347 | 1330 | 1337 | 1334 | R2[ $\delta(\text{N7C12H})(31)+\rho(\text{CNH})(12)]+\delta(\text{C18H28O44})(9)+\delta(\text{N7H42O44})(7)+\rho'(\text{C18H})(5)$                                                         | 1329, 1326 | NCH deformation                      |
| 1320 | 1304 | 1312 | 1306 | $\rho(\text{NH}_3)(13)+\text{R3}[\nu(\text{CC})](30)+\delta(\text{N7H42O44})(7)$                                                                                                           | 1301, 1275 | NH <sub>3</sub> rocking              |
| 1312 | 1295 | 1298 | 1306 | $\nu(\text{C=O4})(39)+\nu(\text{C=O3})(30)+\text{R1}[\delta(\text{CC16})](11)$                                                                                                             | 1296, 1269 | C=O stretching                       |
| 1282 | 1266 | 1266 | 1263 | $\delta(\text{C11H})(32)+\text{R2}[\omega(\text{CNH})(14)+\gamma(\text{CNH})(9)]+\rho(\text{C11H})(10)+\delta(\text{C18H28O44})(8)$                                                        | 1275, 1266 | CH deformation                       |
| 1273 | 1258 | 1252 | 1263 | $\delta(\text{C18H28O44})(21)+\delta(\text{N7H42O44})(13)+\rho'(\text{C18H})(10)+\nu(\text{C17N})(8)+\rho(\text{N7H})(7)+\rho(\text{C18H})(5)+\tau(\text{H42O44})(5)+\rho(\text{NH}_3)(5)$ | 1252, 1245 | CHO deformation                      |
| 1258 | 1243 | 1252 | 1263 | R1[ $\delta(\text{C16CH})(24)+\rho(\text{C10CH})(22)+\nu(\text{CC15})(9)+\nu(\text{CC14})(9)+\rho(\text{C9C})(8)+\omega(\text{C10CH})(5)]$                                                 | 1246, 1231 | Ring 1 CCH deformation + CCH rocking |

|      |      |      |      |                                                                                                                                                                                                               |            |                              |
|------|------|------|------|---------------------------------------------------------------------------------------------------------------------------------------------------------------------------------------------------------------|------------|------------------------------|
| 1234 | 1220 | 1221 | 1219 | $\rho(\text{C11H})(48)+\delta(\text{C11H})(14)+\text{R1}[\nu(\text{C10N})](5)$                                                                                                                                | 1224, 1217 | CH rocking                   |
| 1222 | 1208 | 1221 | 1219 | $\rho(\text{C15H}_3)(14)+\text{R1}[\nu(\text{C9C10})(13)+\delta(\text{C14CC15})(10)+\nu(\text{CC14})(6)+\nu(\text{CC15})(6)]+\rho(\text{C14H}_3)(12)+\rho'(\text{C14H}_3)(6)+\rho'(\text{C15H}_3)(5)$         | 1214, 1196 | CH <sub>3</sub> rocking      |
| 1215 | 1201 | 1221 | 1219 | $\rho'(\text{C18H})(32)+\delta(\text{C18H28O44})(22)+\text{R3}[\nu(\text{C18C19})](8)+\rho(\text{NH}_3)(6)$                                                                                                   | 1200, 1189 | CHrocking                    |
| 1209 | 1196 | 1198 | 1194 | $\text{R3}[\delta_{\text{in}}(\text{C20H})(47)+\nu(\text{C19C20})(7)+\nu(\text{C18C19})(5)]+\rho'(\text{C18H})(14)+\delta(\text{C18H28O44})(9)$                                                               | 1199, 1193 | Ring 3 in plane deformation  |
| 1196 | 1183 | 1198 | 1194 | $\text{R2}[\omega(\text{CNH})(55)+\gamma(\text{CNH})(23)+\nu(\text{C11C})(5)]+\delta(\text{C11H})(4)$                                                                                                         | 1184, 1182 | Ring 2 CNH wagging           |
| 1189 | 1176 | 1177 | 1169 | $\text{R3}[\text{i}_{\text{in}}(\text{CH})(71)+\nu(\text{C21C22})(15)+\nu(\text{C22C23})(7)]$                                                                                                                 | 1176, 1173 | Ring 3 in plane deformation  |
| 1170 | 1158 | 1165 | 1155 | $\text{R2}[\omega(\text{CNH})(18)+\gamma(\text{CNH})(13)]+\text{R1}[\delta(\text{C16CH})(15)+\delta'_{\text{ring}}(6)]+\nu(\text{C11N})(9)$                                                                   | 1160, 1157 | Ring 2 CNH wagging           |
| 1162 | 1150 | 1165 | 1155 | $\rho(\text{NH}_3)(53)+\delta(\text{N8H29O50})(19)$                                                                                                                                                           | 1149, 1140 | NH <sub>3</sub> rocking      |
| 1154 | 1143 | 1165 | 1155 | $\rho(\text{NH}_3)(22)+\text{R2}[\nu(\text{C12N})(13)+\omega(\text{CNH})(10)+\gamma(\text{CNH})(6)+\nu(\text{CC13})(5)]+\delta(\text{N8H29O50})(13)$                                                          | 1140, 1124 | NH <sub>3</sub> rocking      |
| 1134 | 1123 | 1122 | 1118 | $\rho'(\text{C15H}_3)(18)+\rho'(\text{C14H}_3)(16)+\rho(\text{C15H}_3)(11)+\text{R1}[\omega(\text{C9CC})](10)+\rho(\text{C14H}_3)(9)$                                                                         | 1124, 1114 | CH <sub>3</sub> rocking      |
| 1123 | 1113 | 1113 | 1118 | $\delta(\text{C18H28O44})(35)+\rho'(\text{NH}_3)(10)+\rho(\text{C18H})(10)+\rho'(\text{C18H})(6)+\delta(\text{N8C18C17})(6)$                                                                                  | 1101, 1099 | CHO deformation              |
| 1110 | 1100 | 1100 | 1118 | $\nu(\text{C11N})(21)+\text{R1}[\omega(\text{C10CH})(10)+\nu(\text{C10N})(8)+\nu(\text{CC14})(5)+\nu(\text{CC15})(5)]+\text{R2}[\nu(\text{C12N})](6)+\delta(\text{C18H28O44})(5)$                             | 1099, 1088 | CN stretch                   |
| 1094 | 1084 | 1078 | 1080 | $\delta(\text{C18H28O44})(23)+\rho'(\text{NH}_3)(15)+\rho(\text{C18H})(14)+\rho(\text{NH}_3)(7)+\delta(\text{N8C18C17})(6)+\tau(\text{H29O50})(5)+\text{R3}[\nu(\text{C20C21})](5)$                           | 1081, 1065 | CHO deformation              |
| 1051 | 1042 | 1038 | 1053 | $\text{R3}[\nu(\text{CC})(54)+\delta_{\text{trig}}(13)+\delta_{\text{in}}(\text{CH})(20)]$                                                                                                                    | 1042, 1041 | Ring3 CC stretch             |
| 1031 | 1023 | 1024 | 1020 | $\rho(\text{C14H}_3)(28)+\rho'(\text{C15H}_3)(20)+\text{R2}[\delta_{\text{in}}(\text{C=O})(9)+\nu(\text{CC13})(6)]$                                                                                           | 1027, 1024 | CH <sub>3</sub> rocking      |
| 1022 | 1014 | 1024 | 1020 | $\text{R2}[\delta_{\text{in}}(\text{C=O})(19)+\nu(\text{CC13})(10)+\delta(\text{C13O2H51})(7)+\rho(\text{CNH})(5)]+\rho'(\text{C15H}_3)(5)+\omega(\text{N7H})(5)$                                             | 1024, 1018 | C=O in plane bend            |
| 1022 | 1014 | 1024 | 1020 | $\text{R3}[\text{oop}(\text{CH})(68)+\text{puck}(13)+\delta_{\text{trig}}(6)]$                                                                                                                                | 1013, 1010 | Ring3 CH out of plane bend   |
| 1017 | 1009 | 1007 | 1009 | $\text{R3}(\delta_{\text{trig}})(21)+\delta(\text{N7H42O44})(9)+\delta(\text{C12NC})(6)+\text{R2}[\gamma(\text{CNH})](5)+\omega(\text{N7H})(5)$                                                               | 1011, 1002 | Ring 3 deformation           |
| 1014 | 1006 | 1007 | 1001 | $\delta(\text{N7H42O44})(13)+\delta(\text{C12NC})(9)+\omega(\text{N7H})(8)+\text{R3}(\delta_{\text{trig}})(7)+\text{R2}[\gamma(\text{CNH})(7)+\rho(\text{CNH})(5)+\nu(\text{C11C})(5)]$                       | 1002, 998  | NHO deformation              |
| 1002 | 994  | 993  | 989  | $\text{R3}[\text{oop}(\text{CH})(90)+\tau'_a(8)]$                                                                                                                                                             | 993, 981   | Ring3 CH out of plane bend   |
| 982  | 975  | 965  | 972  | $\delta(\text{O50H51O2})(41)+\text{R2}[\delta(\text{C13O2H51})](22)+\rho(\text{O50H49})(6)+\delta(\text{O50H49})(6)+\omega(\text{O50H49})(6)$                                                                 | 967, 949   | OHO deformation              |
| 967  | 960  | 965  | 972  | $\text{R3}[\text{oop}(\text{CH})](25)+\nu(\text{CN8})(9)+\rho(\text{NH}_3)(6)+\omega(\text{C=O5})(6)+\delta(\text{N8H29O50})(6)+\delta(\text{C18H28O44})(5)+\delta(\text{O50H51O2})(5)+\nu(\text{C17C18})(5)$ | 905, 924   | Ring3 CH out of plane bend   |
| 958  | 951  | 955  | 951  | $\text{R1}[\nu(\text{C9C10})(14)+\nu(\text{CC14})(12)+\nu(\text{CC15})(7)]+\rho(\text{C15H}_3)(12)+\text{R2}[\nu(\text{CC13})(9)+\gamma(\text{CNH})(7)+\nu(\text{C11C})(5)]$                                  | 863, 879   | Ring 1 CC stretch            |
| 955  | 948  | 955  | 951  | $\rho'(\text{C14H}_3)(34)+\text{R1}[\nu(\text{CC15})(26)+\nu(\text{CC14})(5)]+\rho(\text{C15H}_3)(19)+\rho(\text{C14H}_3)(5)$                                                                                 | 874, 887   | CH <sub>3</sub> rocking      |
| 941  | 935  | 955  | 929  | $\text{R3}[\text{oop}(\text{CH})](20)+\nu(\text{C17C18})(8)+\omega(\text{N7H})(7)+\nu(\text{CN8})(6)$                                                                                                         | 849, 861   | Ring3 CH out of plane bend   |
| 912  | 906  | 880  | 875  | $\delta(\text{N7H42O44})(21)+\nu(\text{CN8})(13)+\omega(\text{N7H})(10)+\omega(\text{O44H42})(7)+\delta(\text{N8C18C17})(7)$                                                                                  | 858, 850   | NHO deformation              |
| 882  | 877  | 880  | 875  | $\delta(\text{N7H42O44})(33)+\omega(\text{N7H})(17)+\omega(\text{O44H42})(13)+\tau(\text{C17N})(7)+\tau(\text{H42O44})(6)+\rho(\text{O44H42})(5)$                                                             | 838, 843   | NHO scissoring + NH wagging  |
| 874  | 869  | 880  | 875  | $\nu(\text{C11N})(13)+\text{R2}[\nu(\text{CC13})(12)+\text{oop}(\text{C=O})(9)]+\text{R1}[\nu(\text{C10N})](8)+\tau(\text{C17N})(5)$                                                                          | 834, 839   | CN stretch                   |
| 867  | 863  | 850  | 875  | $\text{R3}[\text{oop}(\text{CH})](96)$                                                                                                                                                                        | 774, 789   | Ring3 CH out of plane bend   |
| 860  | 855  | 850  | 847  | $\delta(\text{N7H42O44})(17)+\omega(\text{N7H})(11)+\text{R1}[\nu(\text{CC16})(9)+\nu(\text{C9C10})(6)]+\text{R2}[\text{oop}(\text{C=O})](5)$                                                                 | 790, 828   | NHO deformation + NH wagging |
| 848  | 843  | 841  | 847  | $\text{R1}[\nu(\text{CC16})(17)+\nu(\text{CC14})(12)+\omega(\text{CC16})(10)+\delta(\text{CC16})(8)+\rho(\text{C10CH})(7)]+\text{R2}(\delta_{\text{ring}})(5)+\delta(\text{N8H29O50})(5)$                     | 808, 811   | Ring 1 CC stretch            |

|     |     |     |     |                                                                                                                                                                                                                                                                          |          |                              |
|-----|-----|-----|-----|--------------------------------------------------------------------------------------------------------------------------------------------------------------------------------------------------------------------------------------------------------------------------|----------|------------------------------|
| 837 | 833 | 841 | 847 | $\omega(\text{C}=\text{O}5)(23)+\delta(\text{C}17\text{C}18\text{C}19)(11)+\delta(\text{N}8\text{H}29\text{O}50)(9)+\delta(\text{N}8\text{C}18\text{C}19)(8)+\rho(\text{C}=\text{O}5)(7)+\nu(\text{CN}8)(5)+\rho(\text{NH}_3)(5)$                                        | 771, 773 | C=O wagging                  |
| 814 | 810 | 811 | 806 | $\text{R}2[\delta_{\text{in}}(\text{C}=\text{O})(13)+\delta_{\text{ring}}(10)+\nu(\text{CC}13)(7)+\text{oop}(\text{C}=\text{O})(5)]+\text{R}1[\omega(\text{CC}16)(7)+\nu(\text{CC}14)(5)]$                                                                               | 675, 770 | Ring 2 C=O in plane bend     |
| 789 | 786 | 783 | 791 | $\tau(\text{H}46\text{O}47)(13)+\omega(\text{O}44\text{H}42)(11)+\delta(\text{O}44\text{H}46\text{O}47)(8)+\rho(\text{O}47\text{H}46)(8)+\text{R}3(\text{puck})(6)+\omega(\text{C}=\text{O}5)(5)$                                                                        | 706, 713 | OH torsion                   |
| 774 | 771 | 783 | 791 | $\tau(\text{H}46\text{O}47)(18)+\rho(\text{O}47\text{H}46)(11)+\delta(\text{N}7\text{H}42\text{O}44)(10)+\delta(\text{O}44\text{H}46\text{O}47)(9)+\omega(\text{O}44\text{H}42)(7)$                                                                                      | 755, 757 | OH torsion                   |
| 769 | 766 | 783 | 766 | $\delta(\text{N}7\text{H}42\text{O}44)(17)+\tau(\text{H}46\text{O}47)(17)+\rho(\text{O}47\text{H}46)(10)+\omega(\text{N}7\text{H})(9)+\delta(\text{O}44\text{H}46\text{O}47)(8)+\omega(\text{O}44\text{H}42)(7)+\text{R}1[\delta(\text{CC}16)](6)$                       | 729, 742 | NHO deformation              |
| 759 | 757 | 744 | 737 | $\omega(\text{N}7\text{H})(24)+\delta(\text{N}7\text{H}42\text{O}44)(23)+\tau(\text{H}46\text{O}47)(9)+\rho(\text{O}47\text{H}46)(6)$                                                                                                                                    | 684, 724 | NH wagging                   |
| 727 | 725 | 725 | 721 | $\delta(\text{N}7\text{H}42\text{O}44)(14)+\omega(\text{N}7\text{H})(10)+\rho(\text{C}=\text{O}5)(6)+\omega(\text{C}=\text{O}5)(6)+\text{R}2(\delta_{\text{ring}})(6)+\delta(\text{C}17\text{C}18\text{C}19)(5)+\delta(\text{NC}17\text{C})(5)$                          | 715, 719 | NHO scissoring               |
| 718 | 716 | 725 | 721 | $\delta(\text{N}8\text{C}18\text{C}17)(22)+\omega(\text{C}=\text{O}5)(21)+\rho(\text{C}=\text{O}5)(5)$                                                                                                                                                                   | 636, 661 | NCC deformation              |
| 715 | 713 | 725 | 721 | $\text{R}3[\text{puck}(58)+\text{oop}(\text{C}21\text{H})(12)+\text{oop}(\text{C}23\text{H})(12)+\text{oop}(\text{C}19\text{C}18)(6)]$                                                                                                                                   | 630, 631 | Ring 3 puckering             |
| 689 | 688 | 691 | 696 | $\text{R}2[\delta(\text{C}13\text{O}2\text{H}51)(12)+\delta_{\text{in}}(\text{C}=\text{O})(8)+\omega(\text{CNH})(7)]+\delta(\text{N}7\text{H}42\text{O}44)(10)+\text{R}1[\nu(\text{SC}11)(7)+\tau'(5)]+\tau(\text{C}17\text{N})(5)$                                      | 657, 668 | Ring 2 COH deformation       |
| 665 | 664 | -   | -   | $\text{R}2[\delta(\text{C}13\text{O}2\text{H}51)(15)+\text{oop}(\text{C}=\text{O})(14)+\omega(\text{CNH})(7)]+\text{R}1[\nu(\text{SC}11)(6)+\omega(\text{CC}16)(6)+\tau(\text{C}11\text{N})(5)]+\delta(\text{N}7\text{H}42\text{O}44)(6)$                                | 607, 610 | Ring 2 COH deformation       |
| 648 | 647 | 650 | 644 | $\tau(\text{O}2\text{H}51)(21)+\delta(\text{O}44\text{H}46\text{O}47)(15)+\text{R}2[\delta(\text{C}13\text{O}2\text{H}51)](13)+\omega(\text{O}44\text{H}42)(13)+\tau(\text{H}46\text{O}47)(12)+\rho(\text{O}44\text{H}42)(6)+\tau(\text{H}49\text{O}50)(6)$              | 573, 599 | OH torsion                   |
| 631 | 630 | 621 | 619 | $\text{R}3(\delta'a)(78)$                                                                                                                                                                                                                                                | 514, 517 | Ring 3 deformation           |
| 606 | 606 | 621 | 619 | $\delta(\text{N}7\text{H}42\text{O}44)(12)+\text{R}2[\delta_{\text{in}}(\text{C}=\text{O})(9)+\text{oop}(\text{C}=\text{O})(8)]+\text{R}3(\delta_a)(9)+\delta(\text{N}8\text{C}18\text{C}19)(8)+\delta(\text{N}8\text{H}29\text{O}50)(6)+\delta(\text{NC}17\text{C})(5)$ | 567, 594 | NHO deformation              |
| 592 | 591 | 593 | -   | $\text{R}2[\text{oop}(\text{C}=\text{O})(19)+\delta_{\text{in}}(\text{C}=\text{O})(8)]+\delta(\text{N}8\text{C}18\text{C}19)(6)+\text{R}3(\delta_a)(5)+\tau(\text{H}49\text{O}50)(5)$                                                                                    | 539, 552 | Ring 2 C=O out of plane bend |
| 572 | 572 | 576 | -   | $\tau(\text{O}2\text{H}51)(21)+\tau(\text{H}49\text{O}50)(17)+\text{R}2[\delta(\text{C}13\text{O}2\text{H}51)](14)+\delta(\text{O}44\text{H}46\text{O}47)(13)+\omega(\text{O}50\text{H}49)(6)$                                                                           | 526, 550 | OH torsion                   |
| 548 | 548 | 576 | -   | $\tau(\text{H}46\text{O}47)(35)+\omega(\text{O}44\text{H}42)(17)+\delta(\text{O}44\text{H}46\text{O}47)(11)+\delta(\text{O}44\text{H}42)(7)+\text{R}1[\nu(\text{SC}9)](5)$                                                                                               | 511, 525 | OH torsion                   |
| 536 | 536 | 523 | -   | $\tau(\text{H}46\text{O}47)(42)+\delta(\text{O}44\text{H}46\text{O}47)(15)+\omega(\text{O}44\text{H}42)(14)+\delta(\text{O}44\text{H}42)(7)+\rho(\text{O}47\text{H}46)(5)$                                                                                               | 486, 519 | OH torsion                   |
| 521 | 521 | 523 | -   | $\text{R}3[\tau_a(21)+\text{oop}(\text{C}19\text{C}18)(13)+\text{puck}(5)]+\omega(\text{N}7\text{H})(9)+\omega(\text{C}=\text{O}5)(7)$                                                                                                                                   | 411, 415 | Ring 3 torsion               |
| 512 | 512 | 515 | -   | $\text{R}2[\delta_{\text{in}}(\text{C}=\text{O})(19)+\text{puck}(9)+\text{oop}(\text{C}=\text{O})(8)]+\text{R}1[\delta_{\text{ring}}(15)+\tau(\text{C}11\text{N})(7)]$                                                                                                   | 462, 464 | Ring 2 C=O in plane bend     |
| 509 | 509 | 501 | -   | $\delta(\text{N}7\text{H}42\text{O}44)(12)+\text{R}1[\nu(\text{SC}11)(6)+\delta'_{\text{ring}}(5)]+\delta(\text{NC}17\text{C})(6)+\text{R}3(\tau_a)(6)$                                                                                                                  | 430, 484 | NHO deformation              |
| 485 | 485 | 476 | -   | $\rho(\text{O}44\text{H}42)(30)+\tau(\text{H}46\text{O}47)(14)+\delta(\text{O}44\text{H}46\text{O}47)(9)+\omega(\text{O}44\text{H}42)(9)+\delta(\text{O}47\text{H}49\text{O}50)(7)+\rho(\text{O}47\text{H}46)(7)+\delta(\text{O}44\text{H}42)(6)$                        | 424, 446 | OH rocking                   |
| 457 | 458 | 476 | -   | $\text{R}2[\text{oop}(\text{C}=\text{O})(11)+\delta_{\text{in}}(\text{C}=\text{O})(9)]+\delta(\text{N}7\text{H}42\text{O}44)(6)+\text{R}1[\nu(\text{SC}11)(5)+\delta(\text{C}14\text{CC}15)(5)]+\rho(\text{O}44\text{H}42)(5)$                                           | 396, 414 | Ring 2 C=O out of plane bend |
| 445 | 446 | 444 | -   | $\omega(\text{O}50\text{H}49)(18)+\delta(\text{O}47\text{H}49\text{O}50)(17)+\delta(\text{O}44\text{H}46\text{O}47)(15)+\tau(\text{H}49\text{O}50)(13)+\delta(\text{O}50\text{H}49)(9)+\rho(\text{O}50\text{H}49)(6)$                                                    | 407, 411 | OH wagging                   |
| 414 | 415 | -   | -   | $\text{R}3[\tau'_a(72)+\text{oop}(\text{CH})(14)]+\tau(\text{CN}8)(6)$                                                                                                                                                                                                   | 368, 381 | Ring 3 torsion               |
| 411 | 412 | 405 | -   | $\delta(\text{N}8\text{H}29\text{O}50)(31)+\tau(\text{CN}8)(27)+\tau(\text{H}29\text{O}50)(11)+\delta(\text{N}8\text{C}18\text{C}17)(5)$                                                                                                                                 | 377, 386 | NHO deformation              |
| 397 | 398 | 405 | -   | $\tau(\text{CN}8)(40)+\delta(\text{N}8\text{H}29\text{O}50)(16)+\tau(\text{H}29\text{O}50)(13)+\rho(\text{C}=\text{O}5)(7)$                                                                                                                                              | 349, 364 | CN torsion                   |
| 378 | 379 | 387 | -   | $\text{R}1[\rho(\text{C}9\text{CC})(30)+\omega(\text{C}9\text{CC})(9)+\rho(\text{CC}16)(8)]+\delta(\text{N}8\text{H}29\text{O}50)(8)+\text{R}2[\delta(\text{C}13\text{O}2\text{H}51)(7)+\delta_{\text{in}}(\text{C}=\text{O})(5)]$                                       | 342, 346 | Ring 1 CC rocking            |
| 373 | 374 | 387 | -   | $\delta(\text{O}47\text{H}49\text{O}50)(28)+\rho(\text{O}47\text{H}46)(22)+\delta(\text{O}44\text{H}46\text{O}47)(14)+\omega(\text{O}44\text{H}42)(5)$                                                                                                                   | 331, 336 | OHO deformation              |
| 361 | 362 | 363 | -   | $\delta(\text{O}47\text{H}49\text{O}50)(19)+\delta(\text{N}8\text{H}29\text{O}50)(18)+\rho(\text{O}47\text{H}46)(15)+\delta(\text{O}44\text{H}46\text{O}47)(9)$                                                                                                          | 309, 327 | OHO deformation              |
| 343 | 344 | 337 | -   | $\text{R}1[\delta(\text{C}14\text{CC}15)(20)+\nu(\text{SC}9)(18)+\omega(\text{C}9\text{CC})(5)]+\tau(\text{CN}8)(10)$                                                                                                                                                    | 288, 293 | Ring 1 CCC deformation       |
| 330 | 331 | 337 | -   | $\tau(\text{CN}8)(23)+\delta(\text{N}8\text{C}18\text{C}17)(16)+\omega(\text{N}7\text{H})(14)+\tau(\text{H}29\text{O}50)(8)+\tau(\text{C}17\text{C}18)(6)$                                                                                                               | 302, 305 | CN torsion                   |

|     |     |     |   |                                                                                                                                                                                                                                                                                                                                                |          |                          |
|-----|-----|-----|---|------------------------------------------------------------------------------------------------------------------------------------------------------------------------------------------------------------------------------------------------------------------------------------------------------------------------------------------------|----------|--------------------------|
| 329 | 330 | 337 | - | $\rho(\text{C}=\text{O}5)(13)+\tau(\text{CN}8)(12)+\text{R}2[\delta(\text{C}13\text{O}2\text{H}51)](11)+\delta(\text{N}8\text{H}29\text{O}50)(8)+\omega(\text{N}7\text{H})(6)+\tau(\text{H}29\text{O}50)(6)+\delta(\text{N}7\text{H}42\text{O}44)(5)+\text{R}3[\delta_{\text{in}}(\text{C}19\text{C}18)](5)$                                   | 273, 262 | C=O5 rocking             |
| 308 | 309 | 337 | - | $\text{R}2[\delta(\text{C}13\text{O}2\text{H}51)](30)+\delta(\text{C}18\text{H}28\text{O}44)(11)+\rho(\text{C}=\text{O}5)(10)$                                                                                                                                                                                                                 | 265, 269 | Ring 2 COH deformation   |
| 300 | 302 | 293 | - | $\tau(\text{CC}14)(44)+\tau(\text{CC}15)(10)+\text{R}1[\delta'_{\text{ring}}(7)+\nu(\text{CC}16)(6)+\delta(\text{C}14\text{CC}15)(6)]$                                                                                                                                                                                                         | 253, 278 | CC torsion               |
| 299 | 301 | 293 | - | $\tau(\text{CC}15)(14)+\text{R}1[\delta(\text{C}14\text{CC}15)(12)+\delta'_{\text{ring}}(10)+\rho(\text{C}9\text{CC})(10)+\gamma(\text{C}9\text{CC})(6)+\nu(\text{CC}16)(5)+\nu(\text{SC}9)(5)]+\tau(\text{CC}14)(8)$                                                                                                                          | 237, 252 | CC torsion               |
| 271 | 273 | 260 | - | $\omega(\text{N}7\text{H})(15)+\text{R}2[\delta(\text{C}13\text{O}2\text{H}51)(10)+\text{oop}(\text{C}=\text{O})(7)]+\tau(\text{C}17\text{C}18)(6)+\delta(\text{O}47\text{H}49\text{O}50)(5)+\omega(\text{O}47\text{H}46)(5)+\tau(\text{C}17\text{N})(5)+\tau(\text{H}42\text{O}44)(5)$                                                        | 248, 243 | NH wagging               |
| 261 | 262 | 260 | - | $\omega(\text{O}47\text{H}46)(24)+\delta(\text{O}47\text{H}49\text{O}50)(20)+\rho(\text{O}47\text{H}46)(16)+\tau(\text{H}46\text{O}47)(14)+\delta(\text{O}47\text{H}46)(10)+\delta(\text{O}44\text{H}46\text{O}47)(5)$                                                                                                                         | 228, 231 | OH wagging               |
| 259 | 260 | 260 | - | $\omega(\text{O}47\text{H}46)(19)+\rho(\text{O}47\text{H}46)(15)+\delta(\text{O}47\text{H}49\text{O}50)(14)+\tau(\text{H}46\text{O}47)(11)+\delta(\text{O}47\text{H}46)(8)+\tau(\text{CC}15)(7)$                                                                                                                                               | 221, 223 | OH wagging + OH rocking  |
| 246 | 248 | 260 | - | $\tau(\text{CN}8)(18)+\delta(\text{N}7\text{H}42\text{O}44)(15)+\delta(\text{N}8\text{C}18\text{C}17)(10)+\tau(\text{C}17\text{C}18)(8)+\delta(\text{N}8\text{H}29\text{O}50)(7)+\delta(\text{C}12\text{NC})(6)+\delta(\text{C}18\text{H}28\text{O}44)(5)$                                                                                     | 198, 217 | CN torsion               |
| 238 | 239 | 226 | - | $\text{R}1[\gamma(\text{C}9\text{CC})](35)+\delta(\text{N}8\text{H}29\text{O}50)(7)+\delta(\text{N}7\text{H}42\text{O}44)(6)+\text{R}2[\delta(\text{C}13\text{O}2\text{H}51)](6)$                                                                                                                                                              | 206, 208 | Ring 1 CC twisting       |
| 222 | 223 | 226 | - | $\delta(\text{C}18\text{H}28\text{O}44)(18)+\tau(\text{CN}8)(13)+\tau(\text{H}46\text{O}47)(13)+\omega(\text{O}47\text{H}46)(9)+\delta(\text{N}8\text{C}18\text{C}17)(7)+\delta(\text{O}47\text{H}49\text{O}50)(6)+\text{R}2[\delta(\text{C}13\text{O}2\text{H}51)](5)+\delta(\text{N}8\text{H}29\text{O}50)(5)+\tau(\text{C}17\text{C}18)(5)$ | 170, 193 | CHO deformation          |
| 215 | 217 | 226 | - | $\text{R}2[\delta_{\text{in}}(\text{C}=\text{O})(13)+\delta(\text{C}13\text{O}2\text{H}51)(12)]+\text{R}1[\omega(\text{C}9\text{CC})(6)+\gamma(\text{C}9\text{CC})(5)]+\tau(\text{CC}15)(5)$                                                                                                                                                   | 181, 186 | Ring 2 C=O in plane bend |
| 206 | 207 | 207 | - | $\delta(\text{N}7\text{H}42\text{O}44)(13)+\omega(\text{O}44\text{H}42)(13)+\omega(\text{N}7\text{H})(9)+\tau(\text{C}17\text{C}18)(8)+\delta(\text{C}18\text{H}28\text{O}44)(7)$                                                                                                                                                              | 156, 165 | NHO deformation          |
| 185 | 186 | 207 | - | $\delta(\text{C}18\text{H}28\text{O}44)(26)+\text{R}2[\delta(\text{C}13\text{O}2\text{H}51)](10)+\delta(\text{N}8\text{H}29\text{O}50)(7)+\tau(\text{CN}8)(6)+\tau(\text{H}42\text{O}44)(5)$                                                                                                                                                   | 145, 154 | CHO deformation          |
| 172 | 174 | 207 | - | $\tau(\text{CN}8)(26)+\delta(\text{N}8\text{H}29\text{O}50)(15)+\delta(\text{C}18\text{H}28\text{O}44)(12)+\tau(\text{C}17\text{C}18)(9)+\delta(\text{O}47\text{H}49\text{O}50)(7)+\delta(\text{N}8\text{C}18\text{C}17)(6)+\delta(\text{N}7\text{H}42\text{O}44)(5)$                                                                          | 139, 146 | CN torsion               |
| 172 | 173 | 169 | - | $\omega(\text{O}44\text{H}42)(15)+\text{R}2[\delta(\text{C}13\text{O}2\text{H}51)](12)+\delta(\text{N}8\text{H}29\text{O}50)(10)+\delta(\text{C}18\text{H}28\text{O}44)(7)+\delta(\text{C}17\text{C}18\text{C}19)(6)+\omega(\text{N}7\text{H})(5)+\tau(\text{H}42\text{O}44)(5)$                                                               | 131, 135 | OH wagging               |
| 149 | 150 | 159 | - | $\text{R}2[\delta(\text{C}13\text{O}2\text{H}51)](21)+\text{R}1[\tau(\text{C}11\text{N})](14)+\omega(\text{O}44\text{H}42)(7)$                                                                                                                                                                                                                 | 116, 122 | Ring 2 COH deformation   |
| 134 | 135 | 144 | - | $\text{R}2[\delta(\text{C}13\text{O}2\text{H}51)](27)+\tau(\text{C}17\text{C}18)(12)+\tau(\text{CN}8)(11)+\delta(\text{C}18\text{H}28\text{O}44)(7)$                                                                                                                                                                                           | 101, 113 | Ring 2 COH deformation   |
| 133 | 134 | 127 | - | $\text{R}2[\delta(\text{C}13\text{O}2\text{H}51)](45)+\delta(\text{N}8\text{H}29\text{O}50)(17)+\tau(\text{C}17\text{C}18)(7)$                                                                                                                                                                                                                 | 77, 80   | Ring 2 COH deformation   |
| 112 | 113 | 108 | - | $\tau(\text{C}17\text{C}18)(22)+\delta(\text{N}7\text{H}42\text{O}44)(15)+\delta(\text{C}18\text{H}28\text{O}44)(11)+\omega(\text{N}7\text{H})(11)+\tau(\text{C}12\text{N})(7)+\text{R}2[\delta(\text{C}13\text{O}2\text{H}51)](5)+\rho(\text{O}44\text{H}42)(5)$                                                                              | 94, 100  | CC torsion               |
| 107 | 108 | 108 | - | $\tau(\text{C}17\text{C}18)(24)+\text{R}2[\text{puck}(16)+\delta(\text{C}13\text{O}2\text{H}51)(7)]+\text{R}1[\tau(\text{C}11\text{N})](16)+\omega(\text{N}7\text{H})(6)+\delta(\text{C}18\text{H}28\text{O}44)(5)$                                                                                                                            | 70.4, 90 | CC torsion               |
| 97  | 97  | 108 | - | $\delta(\text{N}7\text{H}42\text{O}44)(49)+\delta(\text{C}18\text{H}28\text{O}44)(22)+\tau(\text{H}42\text{O}44)(8)$                                                                                                                                                                                                                           | 63, 68   | NHO deformation          |
| 78  | 78  | 70  | - | $\text{R}2[\delta(\text{C}13\text{O}2\text{H}51)](26)+\omega(\text{N}7\text{H})(20)+\tau(\text{C}17\text{C}18)(14)+\tau(\text{H}42\text{O}44)(8)+\omega(\text{O}44\text{H}42)(8)+\tau(\text{H}46\text{O}47)(5)+\delta(\text{C}18\text{H}28\text{O}44)(5)$                                                                                      | 56, 66   | Ring 2 COH deformation   |
| 68  | 68  | 70  | - | $\omega(\text{O}44\text{H}42)(35)+\tau(\text{CN}8)(13)+\rho(\text{O}47\text{H}46)(11)+\rho(\text{O}44\text{H}42)(8)+\text{R}2[\delta(\text{C}13\text{O}2\text{H}51)](8)+\omega(\text{N}7\text{H})(5)$                                                                                                                                          | 50, 53   | OH wagging               |
| 64  | 64  | 70  | - | $\tau(\text{CC}16)(28)+\delta(\text{C}18\text{H}28\text{O}44)(11)+\omega(\text{O}44\text{H}42)(9)+\tau(\text{C}17\text{C}18)(8)+\omega(\text{N}7\text{H})(7)+\text{R}2[\delta(\text{C}13\text{O}2\text{H}51)](6)+\tau(\text{CN}8)(5)$                                                                                                          | 32, 45   | CC torsion               |
| 54  | 54  | 57  | - | $\tau(\text{C}17\text{C}18)(33)+\tau(\text{C}12\text{N})(18)+\tau(\text{C}17\text{N})(7)+\text{R}2[\delta(\text{C}13\text{O}2\text{H}51)](7)+\delta(\text{N}8\text{H}29\text{O}50)(6)$                                                                                                                                                         | 38, 47   | CC torsion               |
| 52  | 52  | 57  | - | $\delta(\text{N}7\text{H}42\text{O}44)(24)+\delta(\text{C}18\text{H}28\text{O}44)(23)+\tau(\text{CN}8)(9)+\tau(\text{C}17\text{C}18)(9)+\delta(\text{N}8\text{H}29\text{O}50)(6)+\omega(\text{O}44\text{H}42)(5)$                                                                                                                              | 30, 35   | NHO deformation          |
| 39  | 39  | 57  | - | $\tau(\text{C}17\text{C}18)(30)+\tau(\text{CN}8)(18)+\delta(\text{N}8\text{H}29\text{O}50)(10)+\delta(\text{C}18\text{H}28\text{O}44)(6)+\omega(\text{O}44\text{H}42)(5)$                                                                                                                                                                      | 18, 28   | CC torsion               |
| 36  | 36  | 57  | - | $\text{R}2[\delta(\text{C}13\text{O}2\text{H}51)](35)+\tau(\text{C}12\text{N})(18)+\omega(\text{O}44\text{H}42)(7)+\text{R}1[\tau(\text{C}18\text{C}19)](5)+\tau(\text{CN}8)(5)+\delta(\text{N}7\text{H}42\text{O}44)(5)$                                                                                                                      | 19, 22   | Ring 2 COH deformation   |

|    |    |   |   |                                                                                                                               |       |                                     |
|----|----|---|---|-------------------------------------------------------------------------------------------------------------------------------|-------|-------------------------------------|
| 28 | 28 | - | - | $R2[\delta(C13O2H51)](14)+\tau(H46O47)(8)+\delta(C18H28O44)(8)+R1[\tau(7)+\tau(C18C19)(5)]+\delta(N7H42O44)(6)+\tau(C17N)(5)$ | 27,   | Ring 2 COH deformation + OH torsion |
| 25 | 26 | - | - | $\tau(C17C18)(36)+\tau(H46O47)(14)+\delta(O44H46O47)(12)+\delta(N8H29O50)(9)$                                                 | 8, 13 | CC torsion                          |
| 17 | 17 | - | - | $\tau(H46O47)(49)+\delta(O44H46O47)(20)+\delta(O47H49O50)(7)+\omega(O50H49)(6)$                                               | 14    | OH torsion                          |

---
